# Supplementary material
Source: MDPI journal article supplement (https://www.mdpi.com/2077-1312/9/7/690)
Supplement: s1 [file s1]

## Supplementary Figures

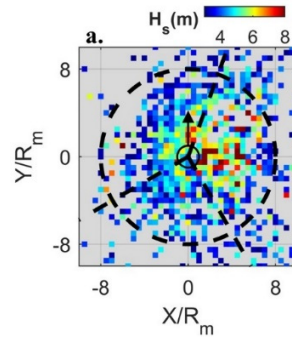

**Figure S1.** Summary of all TC generated  $H_s$  observations (greater than 3 m) in a storm-centric frame of reference with X and Y distances normalized by the radius of maximum winds ( $R_m$ ). Color scale indicates average wave height observed in  $1R_m \times 1R_m$  bins. The dashed circle is  $R_m = 8$  with the small inner circle  $R_m = 1$ . The up arrow denotes the direction of the TCs forward translation.

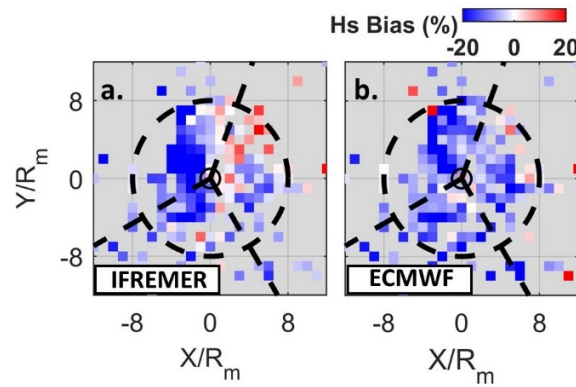

**Figure S2.**  $H_s$  bias at all buoy locations during Hurricane Sandy for (a) IFREMER and (b) ECMWF in a storm-centric frame of reference with distance from the eye normalized by the radius of maximum winds ( $R_m$ ). Observations are binned into  $1R_m \times 1R_m$  bins. The inner circle denotes  $1R_m$  and outer dotted circle denotes  $8R_m$ . Direction of storm motion is up the page.

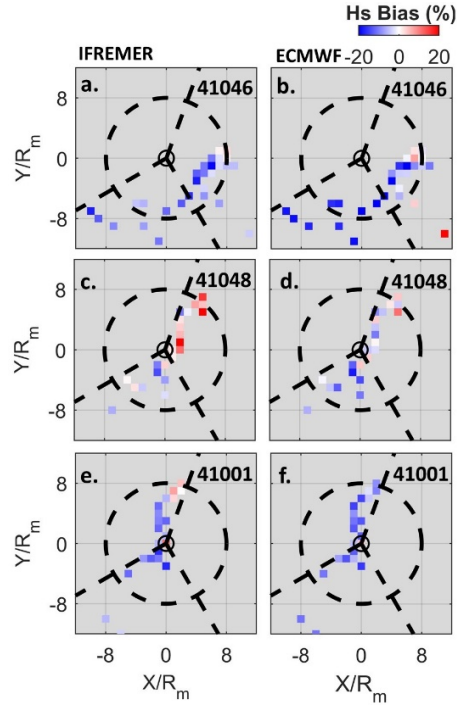

**Figure S3.** (a, c, e) IFREMER and (b, d, f) ECMWF Hs biases at buoys (a, b) 41046, (c, d) 41048, (e, f) 41002 during Hurricane Sandy. Plots are in a storm-centric frame of reference with distance from the eye normalized by the radius of maximum winds ( $R_m$ ). Observations are binned into  $1R_m \times 1R_m$  bins. The inner circle denotes  $1R_m$  and outer dotted circle denotes  $8R_m$ . Direction of storm motion is up the page.
